# Supplementary material for: OMI UV aerosol index data analysis over the Arctic region for future data assimilation and climate forcing applications
Source: Copernicus journal article supplement (doi:10.5194/acp-2022-743), 2022-12-05
Supplement: Supplementary file [file acp-2022-743-AC1-supplement.pdf]

**Comment:** *The identification of the seasonal “ring” features shown in Figure 1 are curious. Have these not been previously identified by the OMI team? And if not I suggest amplifying that this is an original finding as it would be a significant (i.e., important to know) aspect of the dataset that has not previously gotten scrutiny.*

**Response:** Thank you for the comment. To our knowledge, there has been no previous reporting of this “ring” feature over the Arctic region. Following your suggestion, we have amplified the identification of the ring feature to an original finding.

**Comment:** *It does not appear from the figures that you are excluding any OMI data for sub-pixel cloud contamination. You note on line 70 that the AI is calculated in clear and cloudy conditions, but there is a QA screening in the Level 2 that attempts to identify mainly clear pixels (QA=0) from cloud-contaminated (QA=1). Why is that QA consideration seemingly not used in this study?*

**Response:** Thank you for the suggestion. We do not include screening for sub-pixel cloud contamination here for two reasons. First, the impact of clouds on OMI aerosol index is relatively marginal compared to the impact of aerosol. For example, a change of AI value of around 1 is found for cloud optical depth increased from 2 to 20 in overcast conditions (Yu et al., 2012) and we expect smaller impacts from subpixel clouds. Secondly, cloud screening, and especially detection of sub-pixel clouds, is a challenging topic over the Arctic region from passive-based sensors due to bright and cold ice- and snow-covered surfaces. We suspect the OMI instrument experiences the same difficulty, as if we employ a strict cloud screening algorithm using the cloud-contamination flag in the L2 data (cloud fraction less than 0.2), much of the data over the Arctic sea ice is removed. We suspect that there are issues with the cloud screening method for OMI over the Arctic region (e.g. cloud free snow- and ice-covered regions are categorized as cloudy) and thus have not implemented the cloud screening flag as included in the OMI data.

Yu, H., Zhang, Y., Chin M., Liu Z., Omar A., Remer L. A. Yang Y., Yuan T. and Zhang J.: An Integrated Analysis of Aerosol above Clouds from A-Train Multi-sensor Measurements, Remote Sens. Environ., 121, 125–131, <https://doi.org/10.1016/j.rse.2012.01.011>, 2012.

**Comment:** *Line 93: “which seemingly latitude dependent” is not grammatically correct; please correct.*

**Response:** Thank you for the suggestion. We have changed to “which seem to exhibit a latitudinal dependence.”

**Comment:** *Line 103: Please be more precise about the “northern end” of the swath that is meant in screening for unreported bad scan rows. The discussion of this issue seems to suggest*

*that it is a high latitude feature and not significant at lower latitudes (al a Figures 2a & b). Is that correct? Why would that be the case if it is indeed a physical obstruction of the sensor?*

**Response:** Thank you for the suggestion. As far as the “northern end” terminology, we mean the AI data over the Arctic region. We have removed the “northern end” terminology from the text and left the explanation as the OMI rows “over the Arctic region.” In our analysis, we found that some of the unflagged rows exhibit anomalously high AI over the Arctic and report nominal AI values south of the Arctic region, while other unflagged rows are correctly flagged in non-Arctic regions but are not flagged in Arctic regions. We are unsure as to why these rows exhibit this behavior over the Arctic, but our analysis found that this behavior is present in the L2 OMI data.

**Comment:** *Section 3.2: In the discussion of other observing condition related defects in the dataset there is little discussion about limitations of the algorithm beyond the fact of different algorithms used over different surface types. You might consider Colarco et al. (2017) who identified other issues with the algorithm that are perhaps relevant here: there are biases in the OMI aerosol index visible to the extent that the surface pressure of the actual atmosphere differs from the static dataset assumed in the retrieval, and maybe more relevant to this discussion there are identified issues with the radiative transfer used in the retrieval algorithm having to do with the calculation of the Rayleigh atmosphere scattering over terrain where non-linear RT impacts were nevertheless linearly interpolated between two extreme pressures and that were manifest in bias in the AI. This could be relevant over topographically variable regions.*

Colarco, P. R., Gassó, S., Ahn, C., Buchard, V., Silva, A. M. da, and Torres, O.: Simulation of the Ozone Monitoring Instrument aerosol index using the NASA Goddard Earth Observing System aerosol reanalysis products, *Atmos Meas Tech*, 10, 4121–4134, <https://doi.org/10.5194/amt-10-4121-2017>, 2017.

**Response:** Thank you very much for the note. We have added discussion to Section 3.2 about the known surface pressure error- and RTM-induced AI biases from the Colarco et al (2017) paper.

**Comment:** *Line 203: The description of the climatology construction requires some further elaboration. If I want to know the AI at a particular latitude/longitude point, does your climatology tell me that? Is there a multi-dimensional histogram at each lat/lon point binned as described in SZA, VZA, etc? Is there no time dependence then in the climatological value at a given point? I think this just needs some additional clarification. (And how many bins of SZA, VZA, ...?)*

**Response:** Thank you for the comment. As long as the viewing geometries and surface properties are provided for the desired lat/lon point, climatological AI can be computed. For example, if the climatology value for an OMI pixel is desired, the viewing geometry and surface properties associated with that OMI pixel are used to find the climatology value. There is no multi-dimensional histogram at each lat/lon point, as the climatology is not location-specific. There is a time dependence for the climatological values, as the climatology is constructed on a monthly

basis, as different months have different climatologies. We have added clarification to the methodology section to reflect the details of the climatology.

**Comment:** *It is not clear to me from Figure 7 that the conclusion there is no sensor drift is justified. Looking at the blue line are we supposed to conclude that it is stable after 2011? Because I see a lot variability in the maximum and minimum of the seasonal cycle (not to mention the high value after 2020 that is noted in the text). This analysis seems incomplete, or anyway not very convincing.*

**Response:** Thank you for your question. We want to ensure that there is no significant drift in the OMI sensor that could falsely generate trends over the Arctic, so we checked for significant drift here. We followed the reviewer's suggestion and modified Figure 7 to include the deseasonalized AI trends by removing seasonal patterns. There is still some slight variation in the monthly averaged AI from 2005 to 2020, with the increase in 2020 being the most prominent. Overall, however, these variations are very small, with most variations being less than 0.1 AI in magnitude, showing that there is no significant sensor drift. We also suspect the higher AI values from 2020 are real signals from Australian wildfires that spread smoke aerosols over large swaths of the Pacific Ocean, including our "remote ocean" zone, in 2020. We also added discussion accordingly.

**Comment:** *Line 295 and past: I don't understand this spatial sampling bias between the perturbed and screened assessments. Why would OMI rows 56-60 necessarily and systematically miss smoke events at high northern latitudes?*

**Response:** Thank you for the question. The perturbing method employs the use of all available sensor rows in any given month, while the screening method uses only the five rows 56 – 60, so even at the high northern latitudes, the addition of OMI rows 1 – 22 in the perturbed dataset can greatly affect the smoke events being sampled. Only rows 56 – 60 were selected for the screening method as those rows have high relative azimuth angles larger than 100° and are unaffected by row anomaly in the Arctic region through the entire study period. This reduces sampling-related biases (e.g. avoiding cases in which there are more rows in some years and fewer rows in other years) in the trend analysis. We are unsure what the reviewer means by OMI rows 56 – 60 "systematically miss smoke events at high northern latitudes." We assume smoke events and OMI rows are uncorrelated. We note how similar the perturbed and screened datasets are north of the 80° N circle in Figure 8; in that region, even the perturbed dataset only has coverage from OMI rows 56 – 60. Outside of that circle, however, the perturbed dataset has coverage from rows 1 – 22, which likely causes the differences between the June and July trends in the southern Arctic ocean.

**Comment:** *Line 302: What is the rationale for appealing to lower boundary condition issues? What does that even mean in this context?*

**Response:** Thank you for the comment. We appeal to lower boundary condition issues here because of the geographic differences in AI climatology and trend over the Greenland land mass versus the surrounding ocean water. We wouldn't expect meteorological sources to cause a clear difference in AI climatology and trend along the border of Greenland.

Suggestions for the figures:

**Comment:** Polar projection plots in Figures 1,2,3,5,6,8: Please put some lat/lon lines on the plots. In most cases you are referring in the text to specific latitude regions, so that would be helpful. Something like in Figures 9 & 10.

**Response:** Thank you for the suggestion. We have added lat/lon lines to Figures 1,2,3,5,6 and 8, and have modified the lines in Figures 9 & 10 to match the others.

**Comment:** The continuous color bar in Figure 9a should be replaced with a discrete one since the years are in discrete colors (I think).

**Response:** Thank you for the suggestion. The years are in discrete colors, so we have converted the continuous color bar to a discrete one.

**Comment:** Figure 11d: Suggest changing the y-axis label to show integer only labels since it is an integer quantity plotted.

**Response:** Thank you for the suggestion. We have changed the y-axis labels to show integers.
